1 **Metagenomic discovery and co-infection of diverse wobbly possum**  
2 **disease viruses and novel hepaciviruses in**  
3 **Australian brushtail possums**

4  
5  
6 Wei-Shan Chang<sup>1†</sup>, John-Sebastian Eden<sup>1,2†</sup>, William J. Hartley<sup>3\*</sup>, Mang Shi<sup>1</sup>, Karrie Rose<sup>3,4</sup>,  
7 Edward C. Holmes<sup>1</sup>

8  
9  
10 <sup>1</sup>Marie Bashir Institute for Infectious Diseases and Biosecurity, Charles Perkins Centre,  
11 School of Life and Environmental Sciences and Sydney Medical School, University of  
12 Sydney, Sydney, NSW, Australia.

13 <sup>2</sup>Westmead Institute for Medical Research, Centre for Virus Research, Westmead, NSW,  
14 Australia.

15 <sup>3</sup>Australian Registry of Wildlife Health, Taronga Conservation Society Australia, Mosman,  
16 NSW, Australia.

17 <sup>4</sup>James Cook University, College of Public Health, Medical & Veterinary Sciences,  
18 Townsville, QLD, Australia.

19  
20 †Authors contributed equally

21 \* In memoriam 1922-2014

22  
23  
24 **Corresponding author**

25 Edward C. Holmes

26 Email: [edward.holmes@sydney.edu.au](mailto:edward.holmes@sydney.edu.au)

27 Phone: +61 2 9351 5591

28  
29 **Key words:** RNA-sequencing, meta-transcriptomics, wobbly possum disease, neurological  
30 disease, arterivirus

31 **Abstract**

32 **Background.** Australian brushtail possums (*Trichosurus vulpecula*) are an introduced pest  
33 species in New Zealand, but native to Australia where they are protected for biodiversity  
34 conservation. Wobbly possum disease (WPD) is a fatal neurological disease of Australian  
35 brushtail possums described in New Zealand populations that has been associated with  
36 infection by the arterivirus (*Arteriviridae*) wobbly possum disease virus (WPDV-NZ).

37 Clinically, WPD-infected possums present with chronic meningoencephalitis, choroiditis  
38 and multifocal neurological symptoms including ataxia, incoordination, and abnormal gait.

39 **Methods.** We conducted a retrospective investigation to characterise WPD in native  
40 Australian brushtail possums, and used a bulk meta-transcriptomic approach (i.e. total  
41 RNA-sequencing) to investigate its potential viral aetiology. PCR assays were developed for  
42 case diagnosis and full genome recovery in the face of extensive genetic variation.

43 **Results.** We identified a distinct lineage of arteriviruses from archival tissues of WPD-  
44 infected possums in Australia, termed wobbly possum disease virus AU1 and AU2.

45 Phylogenetically, WPDV-AU1 and WPDV-AU2 shared only ~70% nucleotide similarity to  
46 each other and the WPDV-NZ strain, suggestive of a relatively ancient divergence. Notably,  
47 we identified a novel and divergent hepacivirus (*Flaviviridae*) - the first in a marsupial - in  
48 both WPD-infected and uninfected possums, indicative of virus co-infection.

49 **Conclusions.** We have identified a distinctive marsupial-specific lineage of arteriviruses in  
50 mainland Australia that is genetically distinct from that in New Zealand, in some cases co-  
51 infecting animals with a novel hepacivirus. Our study provides new insight into the hidden  
52 genetic diversity of arteriviruses, the capacity for virus co-infection, and highlights the utility  
53 of meta-transcriptomics for disease investigation and surveillance in a One Health context.

## 54 **Background**

55 Wildlife experience a diverse array of infectious diseases, many of which can impact animal  
56 welfare, biodiversity, environmental, livestock, and human health, tourism, and trade. While  
57 there is a growing volume of research into the ecology of wildlife infectious diseases, there  
58 is a marked absence of research on neglected host taxa, neglected geographic areas, and  
59 neglected wildlife pathogens, particularly those that do not threaten human or livestock  
60 health [1]. Similarly, there has been insufficient investigation and surveillance of  
61 “biodiversity diseases” where there are no perceived direct agriculture or human health  
62 links, including such high profile examples as chytrid fungus infection in amphibians and  
63 white nose syndrome in bats [2]. In our fast moving and highly connected world, rapid  
64 diagnosis and response are required to identify, understand and respond to emerging  
65 disease threats. Bias over the nature of emerging disease in wildlife, particularly before a  
66 diagnosis has been established, can rob us of the opportunity to conduct science-based  
67 risk assessments into potential collective health threats and impacts. Wildlife diseases, in  
68 particular, may have implications for the loss of natural biomass and important ecosystem  
69 services such as clean water and pollination. Wildlife diseases are also central to a One  
70 Health perspective because they can threaten native species with extinction [3], can be  
71 used as biological controls against invasive pest species, and may act as conduits for  
72 viruses to move to domestic species and ultimately humans [4].

73

74 Although common and widely distributed across Australia, the brushtail possum  
75 (*Trichosurus vulpecula*) is protected under conservation legislation. In contrast, the species  
76 is a highly successful invasive vertebrate pest in New Zealand, where it was introduced  
77 from Tasmania in the 1830s to build a local fur industry [5]. The species then rapidly  
78 adapted to the natural environment of New Zealand, causing devastating destruction to  
79 native forests and wildlife, and functioning as an important reservoir of the bacteria  
80 *Mycobacterium bovis* [6] and *Leptospira* sp. [7, 8]. Brushtail possums in New Zealand are  
81 estimated to cause \$NZ35M/year in agricultural losses and the shared costs of  
82 attempted control exceed \$100M/year [9].

83

84 Wobbly possum disease (WPD) is a severe neurological disease of Australian brushtail  
85 possums in New Zealand, caused by a virus of the family *Arteriviridae* (order *Nidovirales*)  
86 termed wobbly possum disease virus (WPDV) [10]. WPDV was first recognized in New  
87 Zealand in diseased possums present at a research facility in 1995, and has subsequently  
88 been found in a free-living population in the same country [11, 12]. In New Zealand, WPD

89 presents as severe, multifocal neurological signs, including incoordination, loss of balance,  
90 head tilt, circling, difficulty climbing, abnormal gait, aimless wandering and can include  
91 central blindness. Most animals are found thin or emaciated and are either anorexic or  
92 exhibit abnormal behaviours such as daytime feeding [12-14]. There are no known  
93 treatments for WPD and affected animals presenting to wildlife carers most often die or are  
94 euthanized. Histologically, cases of WPD in New Zealand are similar to those from  
95 experimentally induced infection with WPDV and include non-suppurative  
96 meningoencephalitis, perivascular inflammation in multiple organs, most consistently liver  
97 and kidney, and salivary gland [15]. The disease in New Zealand has been investigated  
98 through multiple experimental infection trials, transmission trials and the development of  
99 multi-modal diagnostic tools including RT-qPCR, *in situ* hybridisation,  
100 immunohistochemistry, growth of the virus in possum macrophage cell culture, and indirect  
101 ELISA serology [10-12, 15, 16]. In contrast, WPD in brushtail possums in Australia has been  
102 sparsely described and investigated [17, 18].

103

104 Serological surveys in New Zealand from archival cases suggested an estimated WPD  
105 prevalence of 30% in the free-living possum population [19]. Sporadic cases and rare  
106 outbreaks of WPD have been reported in mainland Australia and Tasmania based on similar  
107 clinical presentations, histopathologic changes and exclusion of differential diagnoses such  
108 as trauma, bacterial infection, haemorrhage from rodenticide ingestion, *Angiostrongylus*  
109 *cantonensis* or *Toxoplasma gondii* infection. Previous investigations diagnosed WPD in 21  
110 of 31(68%) brushtail possums with neurological dysfunction in the Sydney basin, New  
111 South Wales between October 1998 and June 2010 [18]. Although a viral aetiology for  
112 mainland Australian WPD has been suspected, a causative agent has not been established  
113 and there is considerable uncertainty surrounding the microbial causes, potential  
114 transmission routes, the infectious dose required to incite disease, carrier states, and other  
115 elements of host-virus ecology.

116

117 Arteriviruses tend to be host species-specific and cause a number of distinct disease  
118 syndromes with unique pathogenesis and epidemiology. Notable pathogens in this family  
119 include equine arteritis virus, porcine reproductive and respiratory syndrome virus, and  
120 simian haemorrhagic fever virus [20]. These viruses are phylogenetically distinct from the  
121 recently emerging *Nidovirales* from the family *Coronaviridae* that have been identified as  
122 pathogens of Australian reptiles, causing respiratory disease in shingleback lizards [21] and  
123 a mass mortality in a species of freshwater turtle associated with Bellinger River virus [22].

124 Phylogenetically, WPDV falls into what appears to be a divergent branch lineage of the  
125 *Arteriviridae* [23]. Current hypotheses for the origin of WPDV in New Zealand are that the  
126 virus evolved and emerged in possums through cross-species transmission after  
127 translocation, or the virus is possum-specific and was carried by animals during their  
128 introduction from Australia [5]. The identification of WPDV in native animals on the  
129 Australian mainland would be important evidence supporting the latter.

130

131 Hepaciviruses are a genus of positive-sense, single-stranded RNA viruses from the family  
132 *Flaviviridae*, the best characterised of which is Hepatitis C virus (HCV) due to its association  
133 with hepatitis and hepatocellular carcinoma in humans worldwide [24]. However, other  
134 hepaciviruses have been identified in dogs [25], horses [26], rodents [27], bats [28] and  
135 ducks [29], and new hepaciviruses are regularly being described in a variety of animal  
136 species. To date, however, hepaciviruses have not been reported from any marsupial  
137 species.

138

139 Herein, we review archived Australian cases of WPD to build a more robust syndrome  
140 description and, where frozen tissues were available, applied total RNA sequencing ("meta-  
141 transcriptomics") to determine the infectious aetiology and potential origins of WPD in  
142 mainland Australian possums, particularly in comparison with syndromes and agents  
143 previously identified in animals from New Zealand. Accordingly, this study provides new  
144 insights into the diversity and origins of a novel group of viral pathogens and illustrates the  
145 utility of meta-transcriptomics as a means to identify complex infections in a One Health  
146 perspective.

147

## 148 **Methods**

### 149 *Sample collection*

150 Samples were collected between May 1999 and June 2010 from nine brushtail possums  
151 found within the greater Sydney basin. All animals were handled under a series of NSW  
152 Office of Environment and Heritage Licences to Rehabilitate Injured, Sick or Orphaned  
153 Protected Wildlife (#MWL000100542). Samples were collected from affected possums post  
154 mortem, immediately after euthanasia via intravenous barbiturates delivered while the  
155 animals were under gaseous anaesthetic (2% isoflurane in 1L/min Oxygen - Isoflurane  
156 100%, Zoetis, Australia) for veterinary examination. Fresh brain, liver and kidney were  
157 collected aseptically and frozen at -80°C. A range of tissues was fixed in 10% neutral  
158 buffered formalin, processed in ethanol, embedded with paraffin blocks, sectioned, stained

159 with haematoxylin and eosin and permanently mounted with a cover slip. Samples were  
160 collected under the Opportunistic Sample Collection Program of the Taronga Animal Ethics  
161 Committee, and under scientific licences #SL10469 and SL100104 issued by the NSW  
162 Office of Environment and Heritage.

163

#### 164 *Historical Case Review*

165 All brushtail possum cases within the Australian Registry of Wildlife Health since systematic  
166 record keeping began in 1981 were evaluated for signalment, clinical signs and histological  
167 lesions. Animals with a combination of visual impairment, severe depression or central  
168 nervous system disturbance in conjunction with non-suppurative lesions in the central  
169 nervous system, optic tracts or eyes were considered to fit the WPD syndrome description.  
170 The severity of non-suppurative lesions in the meninges, cerebral cortex, brainstem,  
171 cerebellum, liver, kidney and eyes were graded on a scale of 0-4 where 0 represented no  
172 discernible lesions and 4 represented severe and extensive lymphoplasmacytic  
173 inflammation. Necrosis was graded on a scale of 0-4 where 1 represented mild, multifocal  
174 single cell necrosis and 4 characterised extensive malacia. Retinal atrophy was similarly  
175 assessed on a scale of 0-4 with grade 4 signifying a nearly acellular ganglion cell layer.

176

#### 177 *Pathogen discovery using meta-transcriptomics*

178 For RNA extraction, archival tissues including brain, liver and kidney samples of animals  
179 were processed using the RNeasy Plus Mini Kit (Qiagen, Germany). RNA concentration and  
180 integrity were measured using a NanoDrop spectrophotometer (ThermoFisher Scientific,  
181 USA) and TapeStation (Agilent). Samples were then pooled in equal proportions based on  
182 tissue type and/or individual cases for different purposes (Table 1). Illumina TruSeq  
183 stranded RNA libraries were prepared on the pooled samples following rRNA depletion  
184 using the RiboZero Gold kit (Epidemiology). Paired-end (100 bp) sequencing of the rRNA-  
185 depleted RNA libraries were then performed on an Illumina HiSeq 2500 system at the  
186 Australian Genome Research Facility (AGRF), Melbourne.

187

188 The meta-transcriptomic analytical pipeline was constructed based on the methods  
189 previously used in our group [30-32]. Accordingly, RNA sequencing reads were trimmed of  
190 low quality bases and adapter sequences and *de novo* assembled using Trinity 2.1.1 [33].  
191 Assembled sequence contigs were annotated using both nucleotide and protein BLAST  
192 searches against the NCBI non-redundant sequence database. To identify low abundance  
193 organisms, the sequence reads were also annotated directly using a Diamond Blastx

194 search against the NCBI virus RefSeq viral protein database (with an e-value cutoff of  
195  $<10^{-5}$ ). Open reading frames were then predicted from the viral contigs in Geneious v11.1.2  
196 [34] with gene annotation and functional predictions made against the Conserved domain  
197 databases (CDD) [35] and Geneious v11.1.2. Virus read abundance was assessed using a  
198 read mapping approach available in the BBmap program [36].

199

#### 200 *PCR assays and genome sequencing of WPDV and possum hepacivirus*

201 Our metagenomic analysis suggested the presence of both WPDV and a novel hepacivirus  
202 (see Results). To confirm their presence in each archival tissue from both diseased or  
203 healthy possums, the initial PCR primers were designed based on aligned sequence reads  
204 generated from RNA-seq libraries (Table 1). Subsequently, SuperScript IV VILO cDNA  
205 synthesis system (Invitrogen) was used to reverse transcribe the RNA from individual cases.  
206 The cDNA generated from the sampled tissues was used for viral specific PCRs targeting  
207 regions identified by RNA-Seq. All PCR assays were performed using Platinum SuperFi  
208 DNA polymerase (Invitrogen) with a final concentration of 0.2  $\mu$ M for both forward and  
209 reverse primers.

210

211 Long, overlapping PCR assays were also developed to complete the genome of two  
212 representative Australian WPDVs (Table S1). Similarly, additional sets of PCR primers for  
213 hepacivirus genome sequencing were designed from RNA-sequencing data of individual  
214 affected cases (Table 1). All PCR products were visualized using agarose gel  
215 electrophoresis and confirmed by both Sanger and MiSeq sequencing.

216

#### 217 *Wobbly possum disease virus qRT-PCR*

218 A quantitative RT-PCR assay targeting the conserved RdRp domain was developed to  
219 identify viruses of all three different lineages of WPDVs (New Zealand, Australia 1 and 2).  
220 The qRT-PCR primers and probe sequences (Integrated DNA Technologies, USA) were  
221 designed as described in SI Table 1. PrimeTime Gene Expression Mastermix (Integrated  
222 DNA Technologies, USA) was used to perform the assays. For absolute quantification, the  
223 pooled genome amplicons were prepared as standards across aerial 10-fold dilution series  
224 of known quantities and used to determine virus copy number.

225

#### 226 *Phylogenetic analysis*

227 To determine the evolutionary relationships of the WDPVs and the novel hepacivirus  
228 identified in this study, we performed phylogenetic analyses of amino acid sequences of

229 the NSP2 protein (the RNA-dependent RNA polymerase (RdRp) of arteriviruses) and the  
230 complete polyprotein of hepacivirus, respectively. All sequences were aligned using MAFFT  
231 version 7 [37] with the L-INS-i algorithm, with all ambiguously aligned regions removed  
232 using TrimAL (v.1.4.1) [38]. Maximum likelihood trees of both data sets were then estimated  
233 using IQ-TREE 1.6.7 [39] utilising the best-fit model of amino acid substitution (LG+F+I+Γ4).  
234 Statistical support for individual nodes was assessed using a bootstrap approach with 1000  
235 replicates, and all trees were midpoint rooted. Finally, phylogenetic trees were visualized  
236 using FigTree v1.4.3 [40].

237

#### 238 *Nucleotide Sequence Accession Numbers*

239 The RNA sequencing data generated in this study have been deposited in the GenBank  
240 Sequence Read Archive under accession numbers PRJNAXXXX. All consensus genome  
241 sequences of identified viruses have been uploaded in GenBank under accession numbers  
242 XXXXX to XXXXXX.

243

## 244 **Results**

### 245 *Clinical and histological description of Australian wobbly possum disease virus cases*

246 Signalment, gross and histopathology data were collated from 474 brushtail possums, 49 of  
247 which fit the syndrome description for WPD. A table chronologically summarising the  
248 clinical and histological findings of WPD in brushtail possums in Australia is included as  
249 Table S2. The index case of WPD on mainland Australia was a juvenile male possum found  
250 in Mosman, NSW in December 1983, while the index case in Tasmania was November  
251 1985 based on Registry records. The majority of WPD cases occurred in adult female  
252 possums (35 female, 9 male, 6 unknown sex, 42 adult, 3 juvenile, 4 unknown age).

253

254 Blindness was the most common presenting sign (n=35) and was characterised by dilated  
255 and unresponsive pupils and lack of a menace reflex. Depression or docility were noted in  
256 six animals. A further 4 animals were found moribund. Clinical signs attributable to the  
257 nervous system included ataxia (n=9), circling (n=4), strabismus (n=1), paralysis (n=2),  
258 nystagmus (n=1), and knuckling (n=1), and these animals were most often concurrently  
259 blind. Some WPD affected animals were maintained in care for many weeks, with stable or  
260 slowly progressive signs. Ophthalmological examination of blind possums often revealed an  
261 optic disc that was pale and lacked the normal fundus vascular tuft. The body condition of  
262 affected possums ranged from excellent to emaciated. The most common cause of death  
263 was euthanasia.



264

265 Common microscopic lesions in WPD affected possums are illustrated in Figure 1 and  
266 included mild to severe non-suppurative leptomeningitis, multifocally extending into the  
267 perivascular spaces of the brainstem, cerebrum and cerebellum. Cellular infiltrates ranged  
268 from 1 to 12 cells deep, and were composed of lymphocytes, plasma cells and smaller  
269 numbers of macrophages. Small foci of gliosis were multifocally evident in the neuropil of  
270 severely affected animals. Neutrophils were seen among the inflammatory infiltrates in only  
271 two animals. Necrosis was a less consistent finding and ranged between mild, multifocal  
272 single cell necrosis of nerve cell bodies, particularly affecting cerebellar Purkinje cells, to  
273 foci of malacia or cerebellar folial atrophy. Wallerian degeneration and spongiotic change  
274 were observed in the optic tracts of the brain, and optic nerve, often in association with  
275 non-suppurative inflammation in the optic nerve, perineurium, retrobulbar fat, and sclera.  
276 Ocular lesions included mononuclear cell infiltrates, as above, evident variably within the  
277 choroid, retina, ciliary body and iris. Retinal atrophy was evident as loss of cellularity within  
278 the ganglion cell and nuclear layers, and occasionally a loss of rods and cones.  
279 Lymphoplasmacytic infiltrates in renal and hepatic tissue were only evident within animals  
280 originating from Tasmania, except in rare cases where concurrent disease could account  
281 for lesions.

282

283 *Meta-transcriptomic discovery of novel WPDV and hepacivirus in Australia brushtail*  
284 *possums*

285 In total, eight rRNA-depleted RNA sequencing libraries were constructed, generating reads  
286 ranging from 23,480,309 to 26,509,764 per pool (Table 1). The first (Pool 1) contained the  
287 pooled brain RNA from three suspected WPDV-infected possums. Our initial analysis did  
288 not identify any assembled viral contigs including any related to WPDV or other  
289 arteriviruses. As low abundance pathogens may not have sufficient coverage for assembly,  
290 the trimmed sequence reads were then further annotated directly (i.e. without assembly)  
291 against the NCBI NR database using Diamond BlastX. This analysis revealed six sequence  
292 reads (three sequence pairs) with homology to WPDV from New Zealand (GenBank  
293 accession: NC\_026811). In addition to the WPDV reads, eight sequence reads from a novel  
294 hepacivirus were present in the same library. Further RNA sequencing libraries were then  
295 prepared from the three individual cases found to be positive for WPDV (of which all were  
296 co-infected with the hepacivirus) that included libraries from multiple tissues where  
297 available (Table 1: cases 3619, 7613, 2545). To determine if any other organisms were  
298 present in the remaining cases, we also sequenced a hepacivirus mono-infection (Table 1:

299 case 2345) as well as a pool of RNAs from those cases negative for both WPDV and  
300 hepacivirus (Table 1: pool 2). Overall, the read abundance of WPDV and hepaciviruses in  
301 each library was low, ranging between 0.000343%-0.000007% (Table 1).

302

### 303 *Identification of divergent lineages of WPDV*

304 Individual PCR assays were designed based on the each of the three arterivirus-like  
305 sequence pairs identified from the initial RNA library and used to confirm the presence of  
306 WPD-like virus in specific cases. However, these PCR assays selectively amplified the  
307 viruses from the WPD-affected cases suggesting extensive genetic variation and the  
308 presence of different lineages of WPDVs in Australia. Accordingly, a more sensitive qRT-  
309 PCR assay was developed based on the conserved RdRp domain and specifically  
310 designed to targeting all WPDVs in this study including the NZ prototype strain. WPDV  
311 sequences were confirmed by qRT-PCR for the three WPD-affected possums including  
312 individual brain, liver and kidney tissues. Importantly, this pan-WPDV qRT-PCR assay did  
313 not identify any new cases and the tissues tested from the control possums (including case  
314 1-4) were all negative. From this, we were also able to determine viral loads, which for  
315 WPD-positive tissues ranged from 21 to 4,777 copies per pg RNA and varied according to  
316 different tissue types. The highest level of WPDV expression was observed in liver tissues  
317 from case 2525 (4,777 copies/pg RNA) and from case 3619 (4,125 copies/pg RNA),  
318 followed by kidney (570 - 1,830 copies/pg RNA) and brain from each diseased possum (17  
319 - 71 copies/pg RNA).

320

### 321 *Comparative genomics and phylogenetics of WPDVs*

322 PCR and sequencing of the WPDV replicase gene showed that the three individual  
323 possums carried distinctive (i.e. case-specific) nucleotide variation in WPDV, comprising  
324 two distinct lineages (Figure 2). In addition, the WPDVs from different organs of each  
325 individual animal formed discrete clusters, strongly suggesting that these results are not due  
326 to cross-sample contamination. Strikingly, pairwise alignment of the partial replicase  
327 polyprotein 1ab nucleotide genome (291 bp) revealed that the two lineages of Australian  
328 WPDV strains exhibited almost the same level of sequence divergence between them as  
329 they did to the New Zealand strain (~70% nucleotide sequence similarity and 77% amino  
330 acid sequence similarity), indicative of substantial intra-specific virus diversity.

331

332 Long overlapping PCRs were used to determine the near complete genomes of two  
333 representative WPDV strains, here termed WPDV-AU1 (case 2545) and AU2 (case 3619). In

334 comparison to the WPDV-NZ strain, the two WPDV-AU genomes retained the arterivirus-  
335 like features, encoding a replicase polyprotein ORF1ab, glycoprotein (GP) 2, 3, 4, 5, and  
336 membrane protein (MP) and nucleocapsid protein (NP) (Figure 3A). The data generated here  
337 enabled us to determine the phylogenetic position of WPDV (both the Australian and New  
338 Zealand strain) within the *Arteriviridae* as a whole through a phylogenetic analysis of 1787  
339 amino acids of the RdRp protein. Notably, WPDV, derived from a marsupial, fell as a sister-  
340 group to those arteriviruses previously documented in placental mammals (Figure 3B). In  
341 addition, the overall phylogeny of the *Arteriviridae* generally mirrors that of the vertebrate  
342 hosts from which they were sampled, with those viruses sampled from fish falling in the  
343 basal position, indicative of virus-host co-divergence for the entire evolutionary history of  
344 vertebrates.

345

#### 346 *A novel possum hepacivirus*

347 Interestingly, our meta-transcriptomic analysis also identified a novel hepacivirus, that we  
348 have termed possum hepacivirus. This virus retains the classical hepacivirus features of a  
349 single-stranded, positive-sense RNA genome of 9,296 bp in length that encodes a single  
350 polyprotein. By further hepacivirus-specific PCR confirmation, we revealed the presence of  
351 the virus in liver, brain and kidney from three WPDV-affected possums and another two  
352 non-WPDV detected possums in our study, thereby revealing virus co-infection in animals  
353 with WPD (Table 2). A phylogenetic analysis of the complete polyprotein of hepacivirus  
354 (3260 amino acids) revealed that possum hepacivirus was most closely related to Norway  
355 rat hepacivirus 2 (accession number: YP\_009109558.1) identified from brown rats (*Rattus*  
356 *norvegicus*) in New York City, US, with which it shared 41.2% sequence similarity in the  
357 polyprotein (Figure 4).

358

## 359 **Discussion**

360 Our retrospective investigation and meta-transcriptomic analysis with subsequent PCR  
361 confirmation revealed that brush-tailed possums in mainland Australia that presented with a  
362 disease syndrome similar to that of WPD seen in New Zealand were infected with an  
363 arterivirus related to WPDV. In addition, three of the five animals presenting with WPD had  
364 evidence of co-infection with a novel hepacivirus, although whether this contributed to the  
365 symptoms and lesions observed is unclear.

366

367 Previously, strong evidence for the association between WPD and a viral aetiology was  
368 obtained using primary cell culture system for virus isolation [16], WPD-specific PCR assays

369 and *in situ* hybridisation[11, 41]. By reproducing WPD in healthy possums with purified  
370 WPDV isolate inoculation, the histological changes highly met the natural infection status,  
371 fulfilling Koch's postulates of causation. In addition, the establishment of the RT-qPCR and  
372 indirect ELISA assays for molecular and serological survey assists understanding disease  
373 prevalence in the wild population in New Zealand [41].

374

375 While the clinical and histological presentation of WPD as described here and by others  
376 varies geographically in wild possum populations in Australia, no active monitoring scheme  
377 is in place to explore the prevalence of the syndrome and diversity of associated viruses.  
378 Histologically, WPD in historical cases from Tasmania consistently had non-suppurative  
379 hepatitis and nephritis, similar to that described in the New Zealand form of WPD, and  
380 distinct from mainland Australian cases, which lack that feature. Importantly, we have  
381 designed a sensitive qRT-PCR assay that is able to detect divergent lineages of WPDV,  
382 including, WPDV-AU1, AU2, which should merit broader application in epidemiological  
383 studies of viral and syndrome prevalence. In addition, our results clearly show how a  
384 metagenomic approach is able to detect viral pathogens even at very low levels of read  
385 abundance, which will be applicable to other wildlife species and One Health scenarios.

386

387 Previous work [15] revealed that the viral loads of WPDV were significantly higher from the  
388 liver of experimental infected possums than other organs including kidney, brain, salivary  
389 glands and bladder, which is consistent with our qRT-PCR. Of note, these results also  
390 show consistently that the lowest viral loads were in the brain tissues. This was also  
391 apparent in the WPDV affected case 7614, which contained no detectable WPDV reads in  
392 the brain tissue by RNA-seq, but was clearly WPDV positive by PCR and Sanger assays.  
393 Although the qRT-PCR assays in our study successfully detected various strains, the viral  
394 loads among different tissues were generally lower than reference results from  
395 experimentally infected possums in the New Zealand studies [41]. This finding may reflect  
396 the often chronic nature of infection in diseased Australian possums, which were frequently  
397 examined several weeks after the onset of disease, but is also likely explained by the  
398 archival nature of our samples and hence relatively low preservation might affect the RNA  
399 integrity due to degradation. However, since our testing number is comparatively small,  
400 speculation on the overall distribution of WPDVs in Australian possum populations remains  
401 challenging. The collection of additional samples from different geographical locations,  
402 closely related, and sympatric species, larger serological and molecular surveys, in

403 conjunction with population and ecological information will clearly assist understanding  
404 virus variation and transmission dynamics in the wild.

405

406 Our phylogenetic analysis reveals that WPDV formed a distinct lineage and that there has  
407 likely been long-term co-divergence between arteriviruses and their vertebrate hosts over  
408 many millions of years. As it is also clear that our sampling of the *Arteriviridae* is sparse, it is  
409 inevitable that more will be discovered through expanded metagenomic studies of diverse  
410 vertebrates. More challenging will be determining exactly how WPDV became established  
411 in brush-tailed possums in both Australia and New Zealand. Reports indicated that WPDV,  
412 or a virus causing similar neurological symptoms, has been present in free-living possum  
413 populations in New Zealand as far back as 1999 [12]. Our investigations track WPD cases  
414 back to 1983 and 1985 on mainland Australia and Tasmania respectively. As no  
415 evolutionary rate is available for WPDV it is currently impossible to perform a direct  
416 estimation of divergence times. However, the substantial sequence divergence between the  
417 Australian mainland and New Zealand strains suggests that their separation is relatively old  
418 and may have occurred close to when possums were introduced from Tasmania into New  
419 Zealand in the 1830s. Additional testing of Tasmanian brushtail possums will be an integral  
420 to addressing the question of whether WPDV was translocated to New Zealand with  
421 possums, or emerged and evolved afterwards.

422

423 A particularly notable aspect of this study was the presence of a novel possum hepacivirus  
424 also identified in our WPD-affected and non WPDV-detected possums. Most animal  
425 hepaciviruses are associated with chronic infection and strong hepatotropism, leading to  
426 hepatitis, cirrhosis, and severe hepatopathy [24]. More recently, a divergent Wenling shark  
427 virus (WLSV) hepacivirus was discovered in the liver of grateful catsharks (*Proscyllium*  
428 *habereri*) using the same bulk meta-transcriptomic approach as utilized here [42]. As the  
429 first documented hepacivirus identified from a marsupial, the novel Brushtail possum  
430 hepacivirus identified here expands the host range of this important group of viruses and  
431 again highlights the potential missing diversity of genus *Hepacivirus*. In addition, that the  
432 Brushtail possum hepacivirus falls in a clade of rodent hepaciviruses indicates that cross-  
433 species transmission has played a key role in shaping phylogenetic patterns. Clearly,  
434 natural infection routes and pathogenesis of this virus in possums merits additional work.  
435 Whether the novel possum hepacivirus identified here contributes to clinical disease or  
436 reduced fitness, alone or in conjunction with WPDV, and the status of both agents in wild  
437 populations remains largely unexplored, but is clearly a key area for future study including

438 the presence in New Zealand animals or any of the inoculums used from previous challenge  
439 studies. More generally, an enhanced understanding of the roles of these and closely  
440 related organisms will shed important light on virome of non-eutherian mammals.

441

## 442 **Conclusions**

443 The total RNA sequencing, or meta-transcriptomic, approach described has elucidated the  
444 pathogen likely responsible for a disease syndrome first detected in Australian mainland  
445 wildlife 36 years ago. Factors that may have contributed to this diagnostic delay and  
446 difficulty include the presentation in a common species, the sporadic rather than outbreak-  
447 based emergence of the syndrome, and the potential pre-conception that the disease  
448 posed no threat to human or livestock health. Nonetheless, the meta-transcriptomic  
449 technique described is becoming more rapid and cost-effective, and has demonstrated its  
450 capacity to remove many barriers delaying or obstructing traditional wildlife disease  
451 investigation. Additional benefits include its capacity to identify co-infections, and to detect  
452 and characterise non-cultivable microbes and those that diverge significantly from nearest  
453 phylogenetic neighbours. Data and knowledge generated from this technique will inform  
454 risk assessments addressing the potential threats and impacts of emergent pathogens in a  
455 One Health paradigm.

456

## 457 **List of Abbreviations**

458 NCBI - National Center for Biotechnology Information.

459 NZ - New Zealand.

460 RT-PCR - Reverse transcription polymerase chain reaction.

461 WPD - Wobbly possum disease.

462 WPDV - Wobbly possum disease virus.

463

## 464 **Declarations**

465 Ethics approval and consent to participate: Samples were collected under the  
466 Opportunistic Sample Collection Program of the Taronga Animal Ethics Committee, and  
467 under scientific licences #SL10469 and SL100104 issued by the NSW Office of  
468 Environment and Heritage.

469

470 Consent for publication: With the exception of WJH (deceased), all authors have agreed to  
471 submission of the final version of the manuscript.

472

473 Availability of data and materials: The RNA sequencing data generated in this study have  
474 been deposited in the GenBank Sequence Read Archive under accession numbers  
475 PRJNAXXXX. All consensus genome sequences of identified viruses have been uploaded in  
476 GenBank under accession numbers XXXXX to XXXXXX.

477

478 Competing interests: None declared.

479

480 Funding: ECH is supported by an ARC Australian Laureate Fellowship (FL170100022).

481

482 Authors' contributions: Conceived the project - JSE, KR, ECH; collected samples - WJH,  
483 KR; performed laboratory work - WSC, JSE, KR; analysed the data - WSC, JSE, MS, KR;  
484 wrote the paper - WSC, JSE, MS, KR, ECH.

485

486 Acknowledgements: This research was supported by Taronga Conservation Society  
487 Australia, Taronga Conservation Science Initiative, and New South Wales National Parks  
488 and Wildlife Service. Our thanks are extended to Jane Hall for diagnostic support and data  
489 management, Dr. Hannah Bender for graphic design of the photomicrographic plate, and to  
490 Drs. Rod Reece, Cheryl Sangster, Shannon Donahoe, Richard Montali, Cathy Shilton, Lydia  
491 Tong, Dr. Andrew Davis and Dr. David Obendorf for their diagnostic contributions on  
492 individual cases.

493 **References**

- 494 1. Tompkins DM, Carver S, Jones ME, Krkosek M, Skerratt LF. Emerging infectious  
495 diseases of wildlife: a critical perspective. *Trends Parasitol.* 2015;31:149-59.
- 496 2. Grogan LF, Berger L, Rose K, Grillo V, Cashins SD, Skerratt LF. Surveillance for  
497 emerging biodiversity diseases of wildlife. *PLoS Pathog.* 2014;10:e1004015.
- 498 3. Gurevitch J, Padilla DK. Are invasive species a major cause of extinctions? *Trends Ecol*  
499 *Evol.* 2004;19:470-4.
- 500 4. Di Giallonardo F, Holmes EC. Exploring host-pathogen interactions through biological  
501 control. *PLoS Pathog.* 2015;11:e1004865.
- 502 5. King CM. *The Handbook of New Zealand mammals.* The Mammal Society, New  
503 Zealand Branch. Wellington: Oxford University Press; 1990.
- 504 6. Coleman JD, Coleman MC, Warburton B. Trends in the incidence of tuberculosis in  
505 possums and livestock, associated with differing control intensities applied to possum  
506 populations. *New Zealand Vet J.* 2006;54:52-60.
- 507 7. Sanhueza JM, Heuer C, Wilson PR, Benschop J, Collins-Emerson JM. Seroprevalence  
508 and risk factors for leptospira seropositivity in beef cattle, sheep and deer farmers in  
509 New Zealand. *Zoonoses Public Health.* 2017;64:370-80.
- 510 8. Eymann J, Smythe LD, Symonds ML, Dohnt MF, Barnett LJ, Cooper DW, et al.  
511 Leptospirosis serology in the common brushtail possum (*Trichosurus vulpecula*) from  
512 urban Sydney, Australia. *J Wildl Dis.* 2007;43:492-7.
- 513 9. <https://predatorfreenz.org/resources/introduced-predator-facts/possum-facts/>.
- 514 10. Dunowska M, Biggs PJ, Zheng T, Perrott MR. Identification of a novel nidovirus  
515 associated with a neurological disease of the Australian brushtail possum (*Trichosurus*  
516 *vulpecula*). *Vet Microbiol.* 2012;156:418-24.
- 517 11. Mackintosh CG, Crawford JL, Thompson EG, McLeod BJ, Gill JM, O'Keefe JS. A newly  
518 discovered disease of the brushtail possum: wobbly possum syndrome. *New Zealand*  
519 *Vet J.* 1995;43:126.
- 520 12. Perrott MR, Meers J, Cooke MM, Wilks CR. A neurological syndrome in a free-living  
521 population of possums (*Trichosurus vulpecula*). *New Zealand Vet J.* 2000;48:9-15.
- 522 13. Giles J, Perrott M, Roe W, Dunowska M. The aetiology of wobbly possum disease:  
523 Reproduction of the disease with purified nidovirus. *Virology.* 2016;491:20-6.
- 524 14. Perrott MR, Wilks CR, Meers J. Routes of transmission of wobbly possum disease.  
525 *New Zealand Vet J.* 2000;48:3-8.



- 526 15. Giles J, Perrott M, Roe W, Shrestha K, Aberdein D, Morel P, et al. Viral RNA load and  
527 histological changes in tissues following experimental infection with an arterivirus of  
528 possums (wobbly possum disease virus). *Virology*. 2018;522:73-80.
- 529 16. Giles JC, Perrott MR, Dunowska M. Primary possum macrophage cultures support the  
530 growth of a nidovirus associated with wobbly possum disease. *J Virol Meth*.  
531 2015;222:66-71.
- 532 17. Hartley WJ. Central nervous system disorders in the brush-tail possum in Eastern  
533 Australia. *New Zealand Vet J*. 1993;41:44-5.
- 534 18. Ma G, Dennis M, Rose K, Spratt D, Spielman D. Tawny frogmouths and brushtail  
535 possums as sentinels for *Angiostrongylus cantonensis*, the rat lungworm. *Vet Parasitol*.  
536 2013;192:158-65.
- 537 19. Giles JC, Johnson W, Jones G, Heuer C, Dunowska M. Development of an indirect  
538 ELISA for detection of antibody to wobbly possum disease virus in archival sera of  
539 Australian brushtail possums (*Trichosurus vulpecula*) in New Zealand. *New Zealand Vet*  
540 *J*. 2018;66:186-93.
- 541 20. Kuhn JH, Lauck M, Bailey AL, Shchetinin AM, Vishnevskaya TV, Bao Y, et al.  
542 Reorganization and expansion of the nidoviral family *Arteriviridae*. *Arch Virol*.  
543 2016;161:755-68.
- 544 21. O'Dea MA, Jackson B, Jackson C, Xavier P, Warren K. Discovery and partial genomic  
545 characterisation of a novel nidovirus associated with respiratory disease in wild  
546 shingleback lizards (*Tiliqua rugosa*). *PLoS One*. 2016;11:e0165209.
- 547 22. Zhang J, Finlaison DS, Frost MJ, Gestier S, Gu X, Hall J, et al. Identification of a novel  
548 nidovirus as a potential cause of large scale mortalities in the endangered Bellinger  
549 River snapping turtle (*Myuchelys georges*). *PLoS One*. 2018;13:e0205209.
- 550 23. Gulyaeva A, Dunowska M, Hoogendoorn E, Giles J, Samborskiy D, Gorbalenya AE.  
551 Domain organization and evolution of the highly divergent 5' coding region of genomes  
552 of arteriviruses, including the novel possum nidovirus. *J Virol*. 2017;91:e02096-16.
- 553 24. Hartlage AS, Cullen JM, Kapoor A. The strange, expanding world of animal  
554 hepaciviruses. *Annu Rev Virol*. 2016;353-75.
- 555 25. Kapoor A, Simmonds P, Gerold G, Qaisar N, Jain K, Henriquez JA, et al.  
556 Characterization of a canine homolog of hepatitis C virus. *Proc Natl Acad Sci USA*.  
557 2011;108:11608-13.
- 558 26. Burbelo PD, Dubovi EJ, Simmonds P, Medina JL, Henriquez JA, Mishra N, et al.  
559 Serology-enabled discovery of genetically diverse hepaciviruses in a new host. *J Virol*.  
560 2012;86:6171-8.

- 561 27. Firth C, Bhat M, Firth MA, Williams SH, Frye MJ, Simmonds P, et al. Detection of  
562 zoonotic pathogens and characterization of novel viruses carried by commensal *Rattus*  
563 *norvegicus* in New York City. *mBio*. 2014;5:e01933-14.
- 564 28. Quan PL, Firth C, Conte JM, Williams SH, Zambrana-Torrel CM, Anthony SJ, et al.  
565 Bats are a major natural reservoir for hepaciviruses and pegiviruses. *Proc Natl Acad Sci*  
566 *USA*. 2013;110:8194-9.
- 567 29. Chu L, Jin M, Feng C, Wang X, Zhang D. A highly divergent hepacivirus-like flavivirus in  
568 domestic ducks. *J Gen Virol*. 2019;100:1234-40.
- 569 30. Eden JS, Rose K, Ng J, Shi M, Wang Q, Sintchenko V, et al. *Francisella tularensis* ssp.  
570 *holarctica* in ringtail possums, Australia. *Emerg Infect Dis*. 2017;23:1198-201.
- 571 31. Shi M, Lin XD, Chen X, Tian JH, Chen LJ, Li K, et al. The evolutionary history of  
572 vertebrate RNA viruses. *Nature*. 2018;556:197-202.
- 573 32. Shi M, Lin XD, Tian JH, Chen LJ, Chen X, Li CX, et al. Redefining the invertebrate RNA  
574 virosphere. *Nature*. 2016;540:539-43.
- 575 33. Haas BJ, Papanicolaou A, Yassour M, Grabherr M, Blood PD, Bowden J, et al. De novo  
576 transcript sequence reconstruction from RNA-seq using the Trinity platform for  
577 reference generation and analysis. *Nat Protoc*. 2013;8:1494-512.
- 578 34. Kearse M, Moir R, Wilson A, Stones-Havas S, Cheung M, Sturrock S, et al. Geneious  
579 Basic: an integrated and extendable desktop software platform for the organization and  
580 analysis of sequence data. *Bioinformatics*. 2012;28:1647-9.
- 581 35. Marchler-Bauer A, Derbyshire MK, Gonzales NR, Lu S, Chitsaz F, Geer LY, et al. CDD:  
582 NCBI's conserved domain database. *Nucleic Acids Res*. 2015;43:D222-6.
- 583 36. BMAP short-read aligner, and other bioinformatics tools. 2016. Available at:  
584 <http://sourceforge.net/projects/bbmap/>.
- 585 37. Katoh K, Standley DM. MAFFT multiple sequence alignment software version 7:  
586 improvements in performance and usability. *Mol Biol Evol*. 2013;30:772-80.
- 587 38. Capella-Gutierrez S, Silla-Martinez JM, Gabaldon T. trimAl: a tool for automated  
588 alignment trimming in large-scale phylogenetic analyses. *Bioinformatics*. 2009;25:1972-  
589 3.
- 590 39. Nguyen LT, Schmidt HA, von Haeseler A, Minh BQ. IQ-TREE: a fast and effective  
591 stochastic algorithm for estimating maximum-likelihood phylogenies. *Mol Biol Evol*.  
592 2015;32:268-74.
- 593 40. <http://tree.bio.ed.ac.uk/software/figtree>.
- 594 41. Dunowska M, Gopakumar G, Perrott MR. Development of a real-time reverse  
595 transcription PCR assay for detection of a novel nidovirus associated with a

- 596 neurological disease of the Australian brushtail possum (*Trichosurus vulpecula*). New  
597 Zealand Vet J. 2013;61:286-91.
- 598 42. Shi M, Lin XD, Vasilakis N, Tian JH, Li CX, Chen LJ, et al. Divergent viruses discovered  
599 in arthropods and vertebrates revise the evolutionary history of the *Flaviviridae* and  
600 related viruses. J Virol. 2016;90:659-69.

601 **Figures**

602

603 **Figure 1. Histopathologic findings in Australian wobbly possum disease cases**

604 **(hematoxylin and eosin).** (A) Focal gliosis (black asterix), non-suppurative cellular infiltrates  
605 distending the leptomeninges (white asterix), and surrounding blood vessels (black  
606 arrowhead) within the brainstem. (B) Lymphocytes, plasma cells and scattered  
607 macrophages around a neural blood vessel. (C) Non-suppurative infiltrates in retrobulbar  
608 adipose tissue (black arrow), the perineurium of the optic nerve (black arrow head), and the  
609 scleral perivascular space (white arrow head). Retinal atrophy with an acellular ganglion cell  
610 layer (black asterix and inset). (D) Distention of the choroid layer with non-suppurative  
611 inflammation (arrow). (E) Optic nerve with Wallerian degeneration, illustrated by a  
612 macrophage within an axonal chamber (black arrowhead), and a non-suppurative  
613 perivascular infiltrate (white arrowhead).

614

615 **Figure 2. Identification of distinct lineages of WPDV in Australia.** (A) Phylogenetic

616 analysis of partial replicase polyprotein 1ab region of WPDV nucleotide genome (291 bp),  
617 showing the NZ reference strains compared to the three Australian cases identified here.  
618 Two major lineages of the Australian viruses were identified - denoted Lineages 1 and 2 -  
619 and coloured in blue and red, respectively. Nodes show bootstrap values from 1,000  
620 replicates. The scale bar shows the number of nucleotide substitutions per site. (B) Pairwise  
621 comparisons of nucleotide similarity (%) across the viral genome.

622

623 **Figure 3. Genome organisation and evolutionary relationships of WPDV to other**

624 **arteriviruses.** (A) Genome features and comparison of three lineages of WPDV - WPDV-  
625 AU1, WPDV-AU2 and WPDV-NZ (GenBank accession: NC\_026811). (B) Phylogenetic  
626 analysis of the arterivirus RdRp protein. Nodes show bootstrap values obtained from 1,000  
627 replicates. Scale bar shows the number of amino acid substitutions per site. The tree was  
628 midpoint rooted for clarity only.

629

630 **Figure 4. Evolutionary relationships of the novel hepacivirus identified from brush-**

631 **tailed possums.** Phylogenetic analysis of the polyprotein gene (RdRp protein) of  
632 hepaciviruses. The novel Brushtail possum hepacivirus is shown in red. Bootstrap values >  
633 70% were presented for key nodes (1,000 replicates). The tree was midpoint rooted for clarity  
634 only. The scale bar shows the number of amino acid substitutions per site.

635

636 **Supplementary Information**

637

638 **Table S1.** PCR primers and qPCR primers for WPDV used in this study.

639

640 **Table S2.** Presentation and pathology of Wobbly Possum Disease in brushtail possums in  
641 Australia. This table chronologically summarises the clinical signs and histological findings  
642 in brushtail possums considered to fit the syndrome description for Wobbly Possum  
643 Disease. Most possums originate from New South Wales on mainland Australia, except for  
644 those denoted with a <sup>T</sup> that originated from Tasmania.

645

646

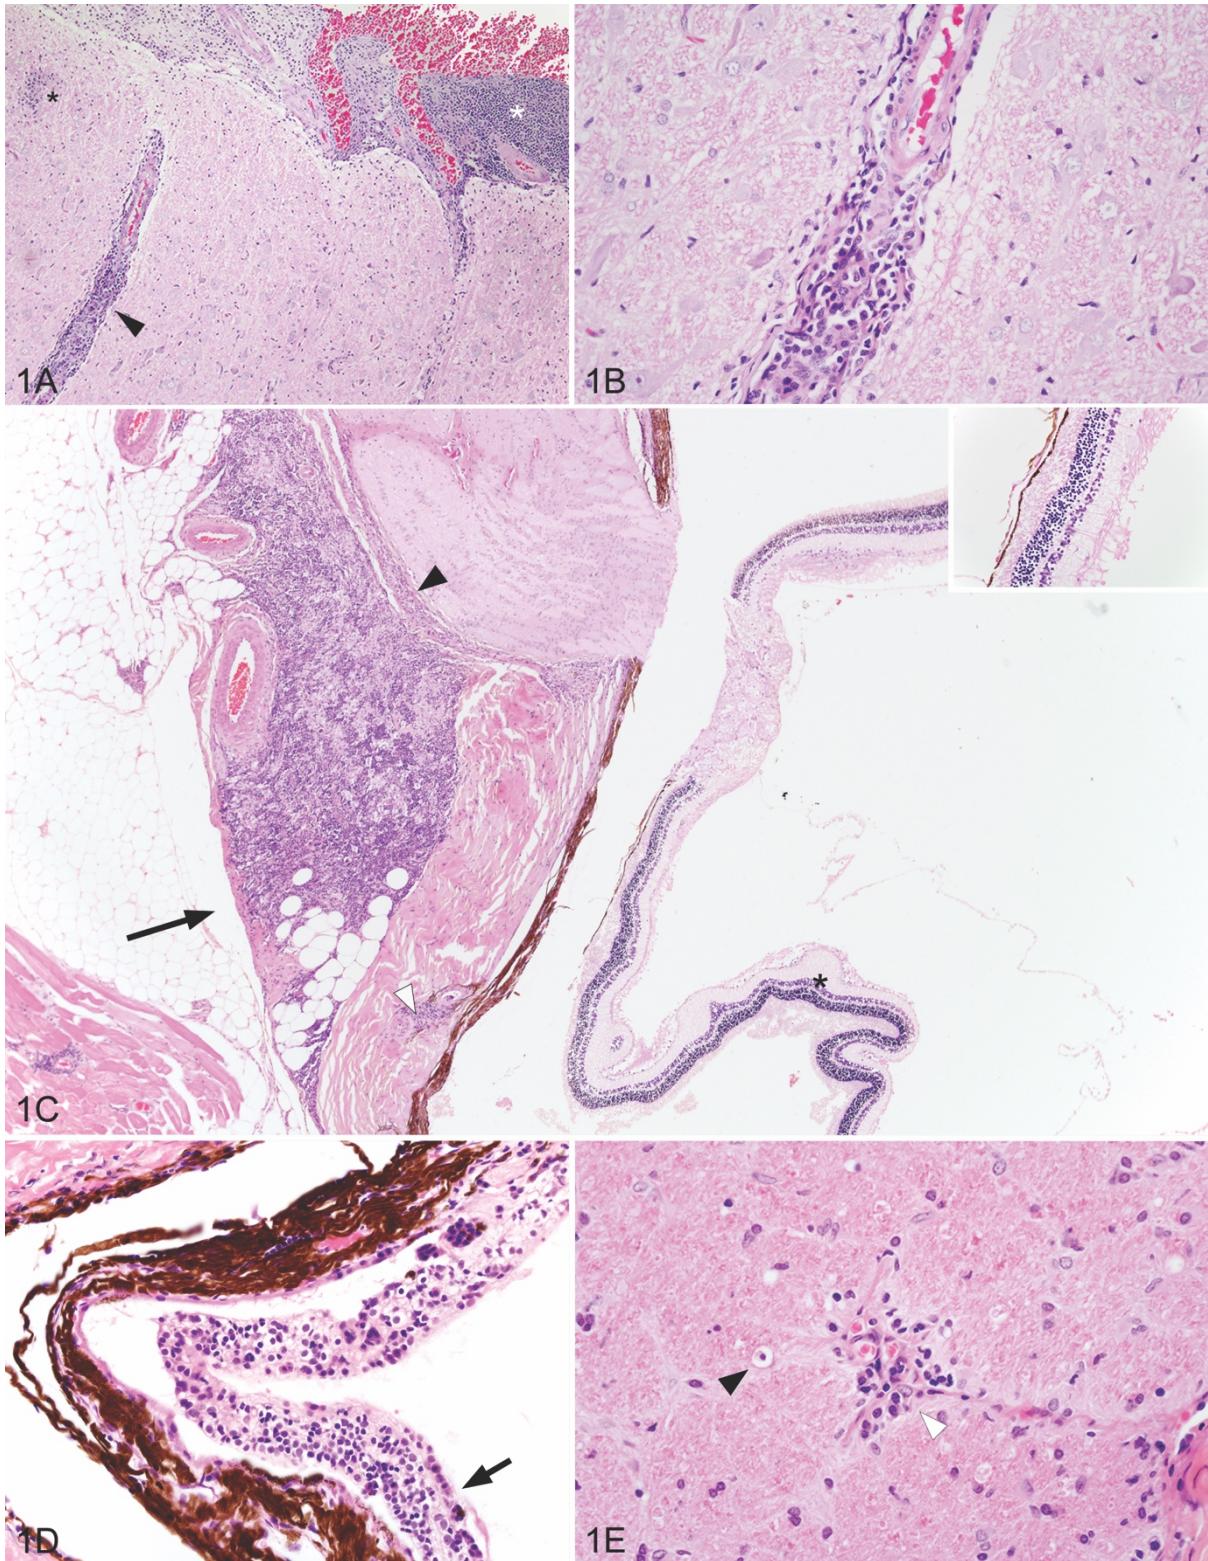

1  
2  
3

**Figure 1**

4

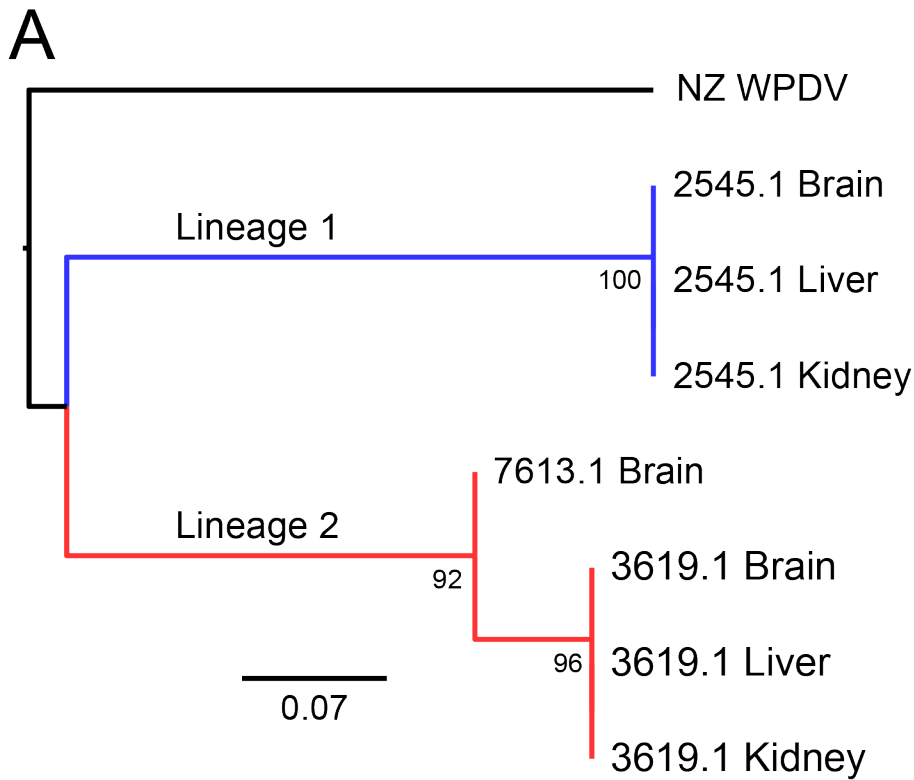

**B**

|         | NZ WPDV | 7613.1 | 2524.1 | 3619.1 |
|---------|---------|--------|--------|--------|
| NZ WPDV | 100%    | 74.6%  | 70.4%  | 74.2%  |
| 7613.1  | 74.6%   | 100%   | 75.6%  | 94.8%  |
| 2545.1  | 70.4%   | 75.6%  | 100%   | 75.3%  |
| 3619.1  | 74.2%   | 94.8%  | 75.3%  | 100%   |

5

6

7 **Figure 2**

8

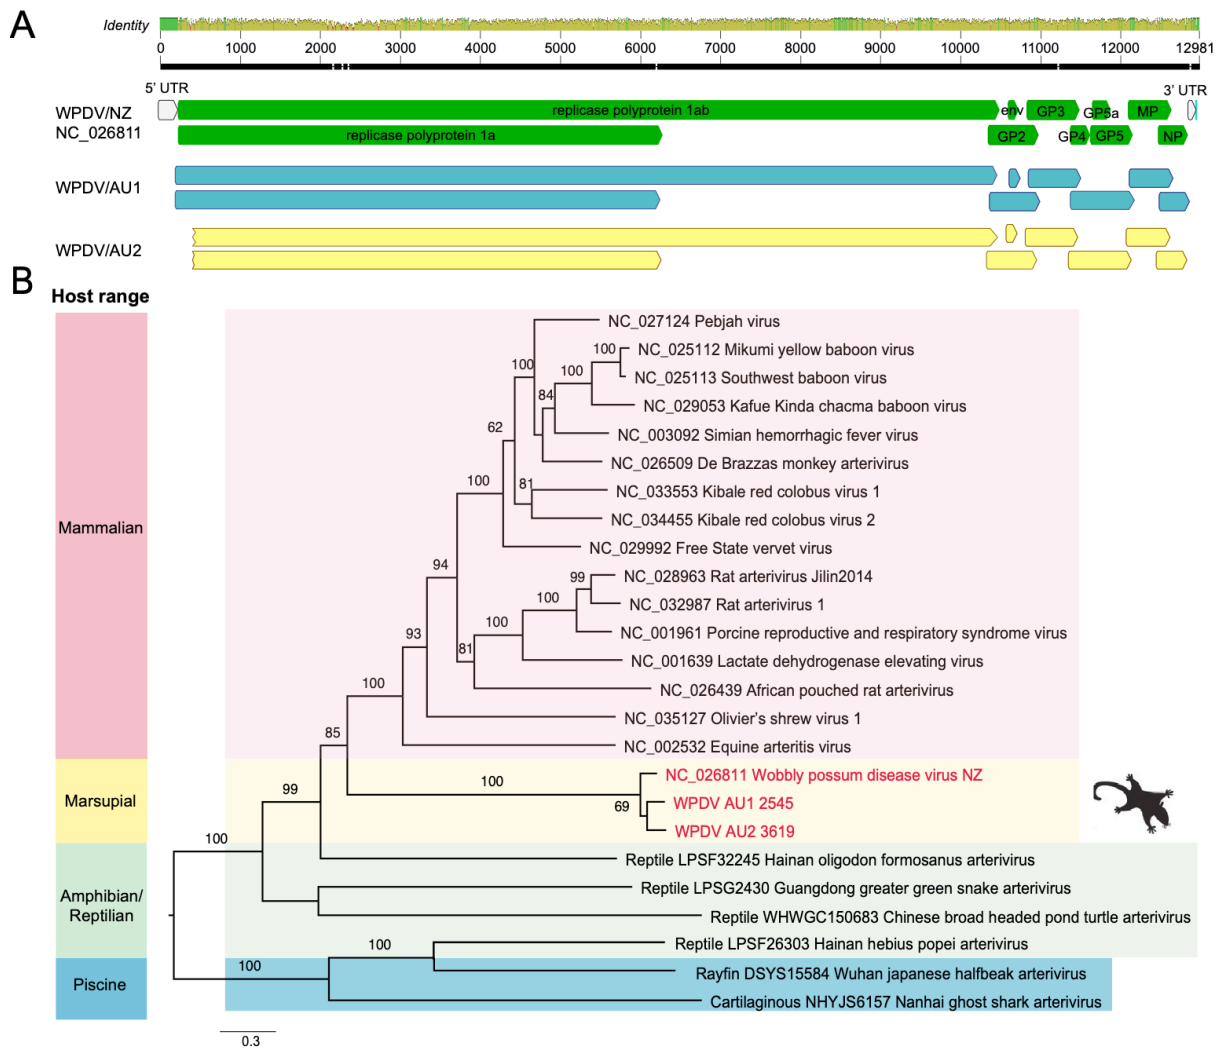

9

10

11 **Figure 3**



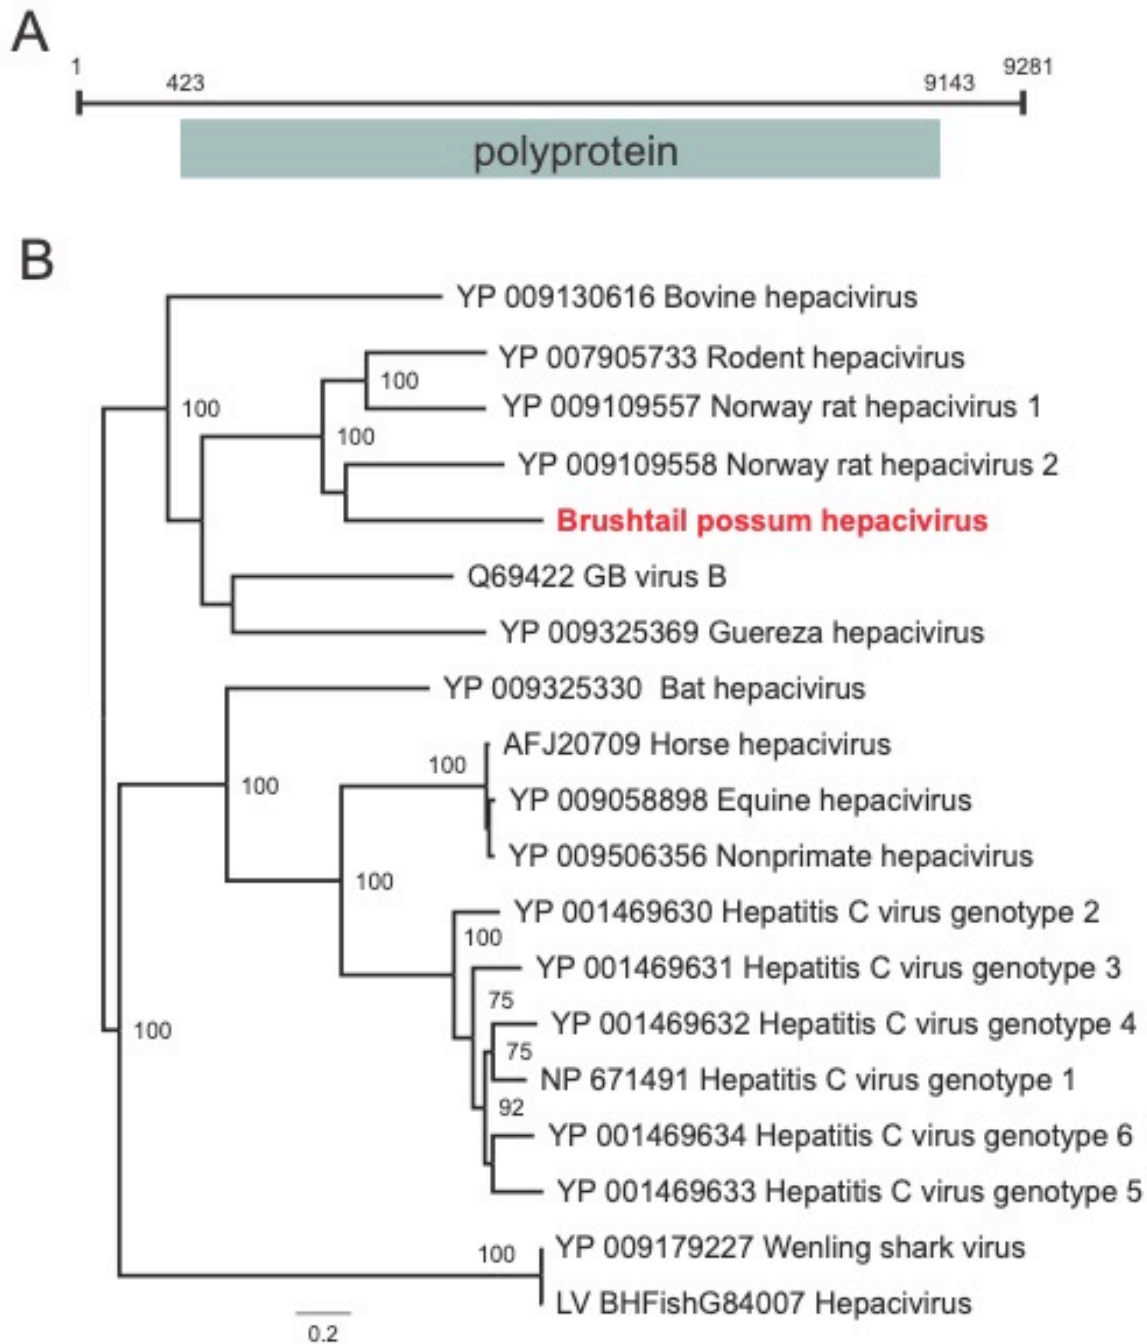

12

13

14 **Figure 4**

15
